# Supplementary material for: Root trait–microbial relationships across tundra plant species
Source: PubMed Central journal article supplement — New Phytol. 2020 Oct 30;229(3):1508–20. doi: 10.1111/nph.16982 (PMC7821200; doi:10.1111/nph.16982), 2020-10-30
Supplement: NPH-229-1508-s001.pdf [file NPH-229-1508-s001.pdf]

## New Phytologist Supporting Information

Article title: Root trait-microbial relationships across tundra plant species

Authors: Clydecia M. Spitzer, Björn Lindahl, David A. Wardle, Maja K. Sundqvist, Michael J. Gundale, Nicolas Fanin and Paul Kardol

Acceptance date: 10 September 2020

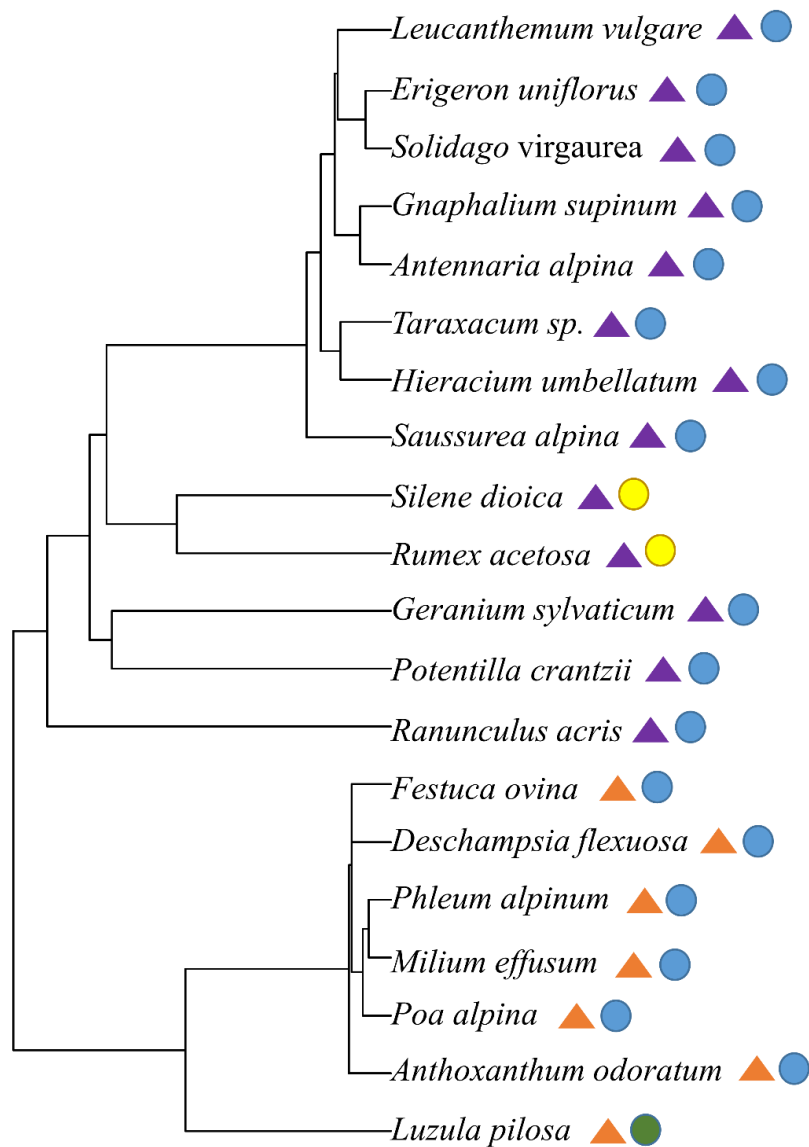

**Figure S1.** Phylogenetic tree with the twenty tundra plant species included in the experiment and their functional group assignment. Purple triangles represent forbs and orange triangles represent forbs. Blue circles represent species commonly found with fine roots colonized by arbuscular mycorrhizal fungi (AMF), yellow circles represent species that are facultative hosts (i.e., non-mycorrhizal or as hosts), while the green circle represents a species rarely found to host AMF. All mycorrhizal classification types are based on Soudzilovskaia *et al.* (2020).

**Table S1.** Mean fine root trait values for all plant species with standard deviations in parentheses. The eleven root traits are root phenol to nitrogen ratio (PhN), root carbon to nitrogen ratio (CNRatio), root nitrogen content (RNC), root carbon content (RCC), root phenol content (TRPC), root forks per root length (RFRL), specific root area (SRA), root dry matter content (RDMC), specific root length (SRL), specific root tip abundance (SRTA) and average diameter (AD).

| Plant species                | AD              | SRTA                     | SRL                    | RDMC                   | SRA                                 | RFRL                      | TRPC                  | RCC             | RNC            | CNRatio         | PhN                   |
|------------------------------|-----------------|--------------------------|------------------------|------------------------|-------------------------------------|---------------------------|-----------------------|-----------------|----------------|-----------------|-----------------------|
|                              | (mm)            | (tips mg <sup>-1</sup> ) | (cm mg <sup>-1</sup> ) | (mg mg <sup>-1</sup> ) | (cm <sup>2</sup> mg <sup>-1</sup> ) | (forks cm <sup>-1</sup> ) | (µg g <sup>-1</sup> ) | (%)             | (%)            | -               | (µg g <sup>-1</sup> ) |
| <i>Antennaria alpina</i>     | 0.32<br>(0.03)  | 185.56<br>(86.33)        | 16.88<br>(3.53)        | 0.10<br>(0.01)         | 1.66<br>(0.23)                      | 9.67<br>(3.43)            | 2.43<br>(0.53)        | 47.66<br>(1.30) | 2.92<br>(0.13) | 16.37<br>(0.95) | 0.83<br>(0.18)        |
| <i>Anthoxanthum odoratum</i> | 0.24<br>(0.02)  | 295.44<br>(57.13)        | 26.09<br>(4.63)        | 0.13<br>(0.03)         | 1.94<br>(0.31)                      | 18.41<br>(2.61)           | 1.14<br>(0.14)        | 48.10<br>(0.59) | 1.26<br>(0.32) | 40.16<br>(9.24) | 0.94<br>(0.20)        |
| <i>Deschampsia flexuosa</i>  | 0.27<br>(0.03)  | 202.33<br>(131.95)       | 19.66<br>(5.78)        | 0.13<br>(0.02)         | 1.63<br>(0.37)                      | 11.97<br>(3.63)           | 1.32<br>(0.32)        | 48.60<br>(0.71) | 1.47<br>(0.12) | 33.27<br>(3.09) | 0.89<br>(0.17)        |
| <i>Erigeron uniflorus</i>    | 0.37<br>(0.02)  | 107.45<br>(53.53)        | 8.73<br>(2.49)         | 0.57<br>(0.98)         | 0.99<br>(0.23)                      | 12.00<br>(3.28)           | 1.56<br>(0.25)        | 48.27<br>(0.34) | 2.71<br>(0.21) | 17.88<br>(1.40) | 0.58<br>(0.13)        |
| <i>Festuca ovina</i>         | 0.25<br>(0.02)  | 231.86<br>(99.03)        | 28.95<br>(10.60)       | 0.12<br>(0.04)         | 2.29<br>(0.88)                      | 9.75<br>(2.45)            | 1.49<br>(0.22)        | 48.56<br>(1.46) | 1.46<br>(0.28) | 34.34<br>(6.59) | 1.05<br>(0.24)        |
| <i>Geranium sylvaticum</i>   | 0.36<br>(0.06)  | 68.48<br>(24.64)         | 7.25<br>(2.85)         | 0.20<br>(0.04)         | 0.79<br>(0.26)                      | 10.31<br>(2.91)           | 1.44<br>(0.42)        | 46.97<br>(1.27) | 1.93<br>(0.65) | 26.21<br>(6.65) | 0.76<br>(0.12)        |
| <i>Gnaphalium supinum</i>    | 0.29<br>(0.003) | 259.23<br>(28.69)        | 21.41<br>(5.85)        | 0.10<br>(0.01)         | 1.96<br>(0.56)                      | 10.83<br>(3.11)           | 1.68<br>(0.47)        | 46.31<br>(0.29) | 2.81<br>(0.13) | 16.49<br>(0.64) | 0.60<br>(0.19)        |
| <i>Hieracium umbellatum</i>  | 0.36<br>(0.03)  | 96.72<br>(51.68)         | 7.44<br>(2.73)         | 0.16<br>(0.03)         | 0.82<br>(0.26)                      | 15.22<br>(7.05)           | 1.45<br>(0.22)        | 47.74<br>(0.88) | 1.95<br>(0.31) | 24.96<br>(3.69) | 0.75<br>(0.12)        |
| <i>Leucanthemum vulgare</i>  | 0.33<br>(0.03)  | 107.14<br>(45.06)        | 10.27<br>(2.20)        | 0.15<br>(0.02)         | 1.06<br>(0.19)                      | 11.56<br>(4.86)           | 1.60<br>(0.21)        | 47.90<br>(0.73) | 1.65<br>(0.08) | 29.16<br>(1.29) | 0.97<br>(0.14)        |

|                            |                |                    |                  |                |                |                 |                |                 |                |                 |                |
|----------------------------|----------------|--------------------|------------------|----------------|----------------|-----------------|----------------|-----------------|----------------|-----------------|----------------|
| <i>Luzula pilosa</i>       | 0.21<br>(0.02) | 792.24<br>(190.27) | 56.56<br>(9.22)  | 0.12<br>(0.04) | 3.79<br>(0.82) | 16.80<br>(1.76) | 1.85<br>(0.63) | 46.45<br>(1.32) | 1.25<br>(0.16) | 37.66<br>(5.39) | 1.45<br>(0.31) |
| <i>Millium effusum</i>     | 0.24<br>(0.05) | 442.14<br>(230.54) | 25.25<br>(8.45)  | 0.15<br>(0.04) | 1.81<br>(0.40) | 23.65<br>(3.80) | 1.22<br>(0.44) | 45.22<br>(1.87) | 1.51<br>(0.18) | 30.46<br>(4.88) | 0.81<br>(0.29) |
| <i>Phleum alpinum</i>      | 0.25<br>(0.02) | 199.02<br>(73.91)  | 24.81<br>(5.56)  | 0.14<br>(0.01) | 1.88<br>(0.30) | 14.78<br>(2.41) | 1.41<br>(0.24) | 48.29<br>(0.48) | 1.51<br>(0.18) | 32.35<br>(4.05) | 0.94<br>(0.18) |
| <i>Poa alpina</i>          | 0.26<br>(0.05) | 225.64<br>(111.92) | 29.22<br>(13.04) | 0.13<br>(0.03) | 2.25<br>(0.67) | 13.12<br>(2.66) | 1.18<br>(0.27) | 48.87<br>(0.38) | 1.69<br>(0.13) | 29.12<br>(2.16) | 0.71<br>(0.22) |
| <i>Potentilla crantzii</i> | 0.30<br>(0.01) | 101.92<br>(21.51)  | 14.34<br>(1.64)  | 0.14<br>(0.01) | 1.33<br>(0.14) | 9.56<br>(1.77)  | 1.73<br>(0.45) | 49.11<br>(1.46) | 2.44<br>(0.19) | 20.20<br>(1.56) | 0.71<br>(0.19) |
| <i>Ranunculus acris</i>    | 0.33<br>(0.01) | 62.04<br>(15.46)   | 10.85<br>(4.24)  | 0.31<br>(0.47) | 1.12<br>(0.16) | 8.17<br>(1.92)  | 1.46<br>(0.10) | 47.37<br>(0.68) | 2.23<br>(0.30) | 21.62<br>(3.08) | 0.67<br>(0.13) |
| <i>Rumex acetosa</i>       | 0.31<br>(0.03) | 143.94<br>(73.23)  | 10.72<br>(4.24)  | 0.23<br>(0.06) | 1.01<br>(0.34) | 19.25<br>(3.70) | 1.20<br>(0.16) | 47.96<br>(0.68) | 1.65<br>(0.28) | 30.00<br>(6.15) | 0.74<br>(0.15) |
| <i>Saussurea alpina</i>    | 0.41<br>(0.05) | 34.23<br>(14.97)   | 6.17<br>(0.94)   | 0.16<br>(0.01) | 0.78<br>(0.06) | 4.17<br>(1.89)  | 1.32<br>(0.21) | 48.02<br>(0.47) | 2.07<br>(0.24) | 23.42<br>(2.67) | 0.64<br>(0.06) |
| <i>Silene dioica</i>       | 0.35<br>(0.03) | 87.83<br>(21.58)   | 6.75<br>(1.19)   | 0.19<br>(0.02) | 0.73<br>(0.07) | 14.57<br>(3.13) | 1.05<br>(0.16) | 46.06<br>(0.54) | 1.32<br>(0.06) | 35.00<br>(1.75) | 0.80<br>(0.14) |
| <i>Solidago virgaurea</i>  | 0.36<br>(0.05) | 50.24<br>(15.82)   | 8.58<br>(2.77)   | 0.16<br>(0.02) | 0.93<br>(0.20) | 7.02<br>(0.63)  | 1.35<br>(0.22) | 48.02<br>(0.70) | 1.64<br>(0.12) | 29.41<br>(1.78) | 0.82<br>(0.13) |
| <i>Taraxacum sp.</i>       | 0.33<br>(0.02) | 72.62<br>(22.18)   | 11.75<br>(3.33)  | 0.14<br>(0.03) | 1.20<br>(0.26) | 4.37<br>(0.90)  | 1.65<br>(0.26) | 48.54<br>(0.57) | 2.09<br>(0.31) | 23.60<br>(3.37) | 0.80<br>(0.17) |

---

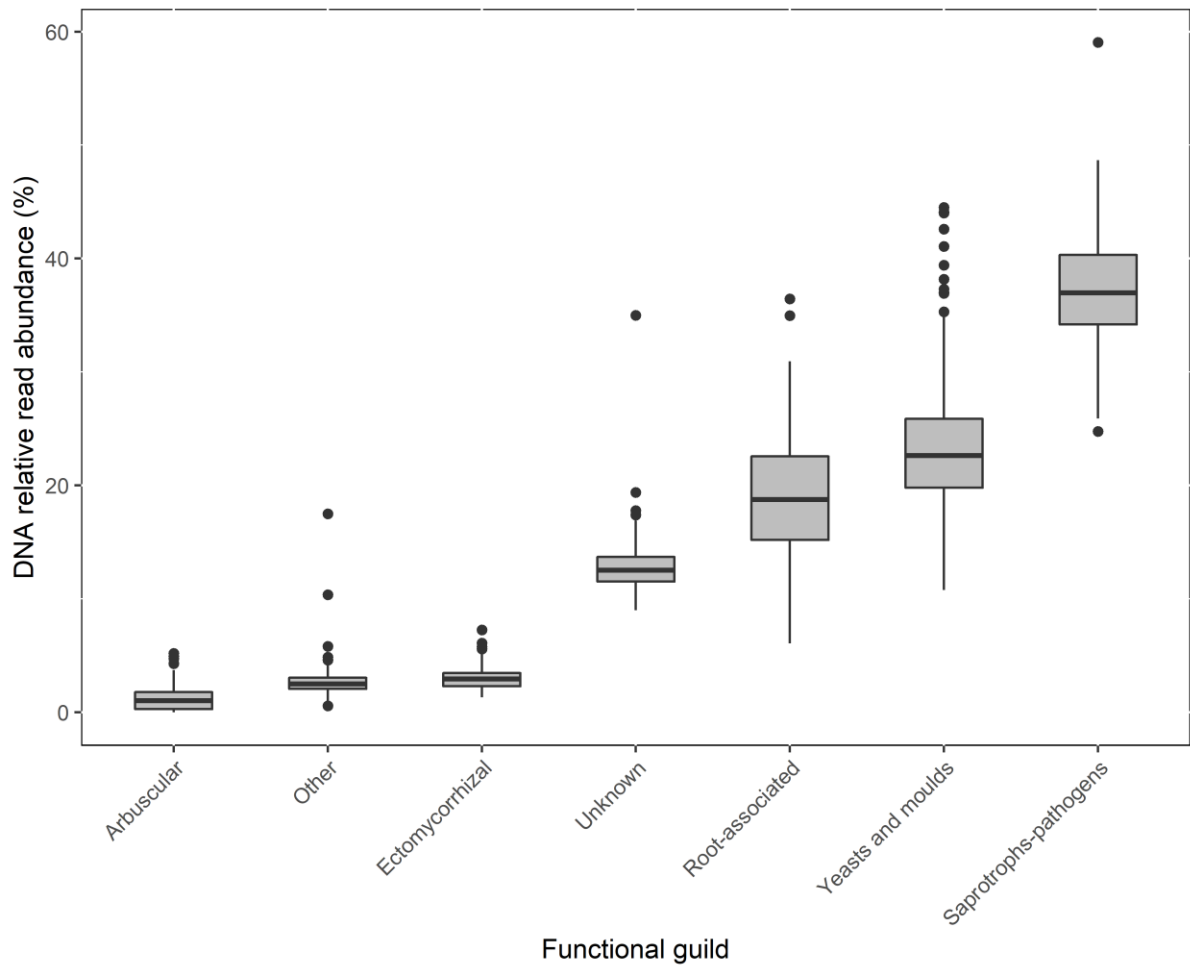

**Fig. S2.** Boxplot showing fungal functional guild DNA relative read abundances averaged across all experimental units. The line in each box is the median value and the box displays the 25<sup>th</sup>–75<sup>th</sup> percentile; whiskers represent the 1.5 inter-quartile range of the upper and lower percentile and outliers are shown as black circles.

**Table S2.** Summary statistics of generalized linear mixed effects models with relative abundances of fungal functional guilds as explained by the root economics spectrum across experimental units. Axis scores from the first two axes from the Principal Component Analysis (PCA) were used as the root economics spectrum.

| Fungal functional group | PCA axis    | Coefficient | Standard Error | Df  | t-value | p-value |
|-------------------------|-------------|-------------|----------------|-----|---------|---------|
| Arbuscular              | (Intercept) | -4.378      | 0.093          | 102 | -47.0   | <0.0001 |
|                         | PCA-axis 1  | -0.055      | 0.040          | 102 | -1.4    | 0.179   |
|                         | PCA-axis 2  | -0.079      | 0.052          | 102 | -1.5    | 0.140   |
| Ectomycorrhizal         | (Intercept) | -3.459      | 0.033          | 102 | -104.2  | <0.0001 |
|                         | PCA-axis 1  | - 0.009     | 0.015          | 102 | -0.6    | 0.547   |
|                         | PCA-axis 2  | - 0.004     | 0.021          | 102 | -0.2    | 0.850   |
| Saprotrophs-pathogens   | (Intercept) | -0.534      | 0.027          | 102 | -20.0   | <0.0001 |
|                         | PCA-axis 1  | -0.010      | 0.009          | 102 | -1. 1   | 0.287   |
|                         | PCA-axis 2  | 0.00005     | 0.013          | 102 | 0.004   | 0.996   |
| Yeasts and moulds       | (Intercept) | -1.149      | 0.052          | 102 | -22.1   | <0.0001 |
|                         | PCA-axis 1  | 0.010       | 0.015          | 102 | 0.7     | 0.502   |
|                         | PCA-axis 2  | -0.006      | 0.020          | 102 | -0.3    | 0.779   |
| Root-associated         | (Intercept) | -1.461      | 0.059          | 102 | -24.8   | <0.0001 |
|                         | PCA-axis 1  | -0.010      | 0.018          | 102 | -0.6    | 0.564   |
|                         | PCA-axis 2  | -0.0004     | 0.025          | 102 | -0.02   | 0.984   |

### Reference(s)

**Soudzilovskaia NA, Vaessen S, Barcelo M, He J, Rahimlou S, Abarenkov K, Brundrett MC, Gomes SIF, Merckx V, Tedersoo L. 2020.** FungalRoot: global online database of plant mycorrhizal associations. *New Phytologist* **227**: 955–966.
